# Supplementary material for: MnO2modified TiN nanotube arrays on Ti mesh for flexible supercapacitors electrode
Source: Royal Society of Chemistry journal article supplement (doi:10.1039/c7ra10961j), 2017-01-01
Supplement: c7ra10961j1.pdf [file c7ra10961j1.pdf]

## Electronic Supplementary Information

### MnO<sub>2</sub> modified TiN nanotube arrays on Ti mesh for flexible supercapacitors

Chao Chen<sup>a</sup> and Xiuchun Yang<sup>a,b\*</sup>

a. Key Laboratory of Advanced Civil Engineering Materials (Tongji University), Education of Ministry, Shanghai 201804, People's Republic of China; b. School of Materials Science and Engineering, Tongji University, Shanghai, 200092, People's Republic of China. E-mail: [yangxc@tongji.edu.cn](mailto:yangxc@tongji.edu.cn).

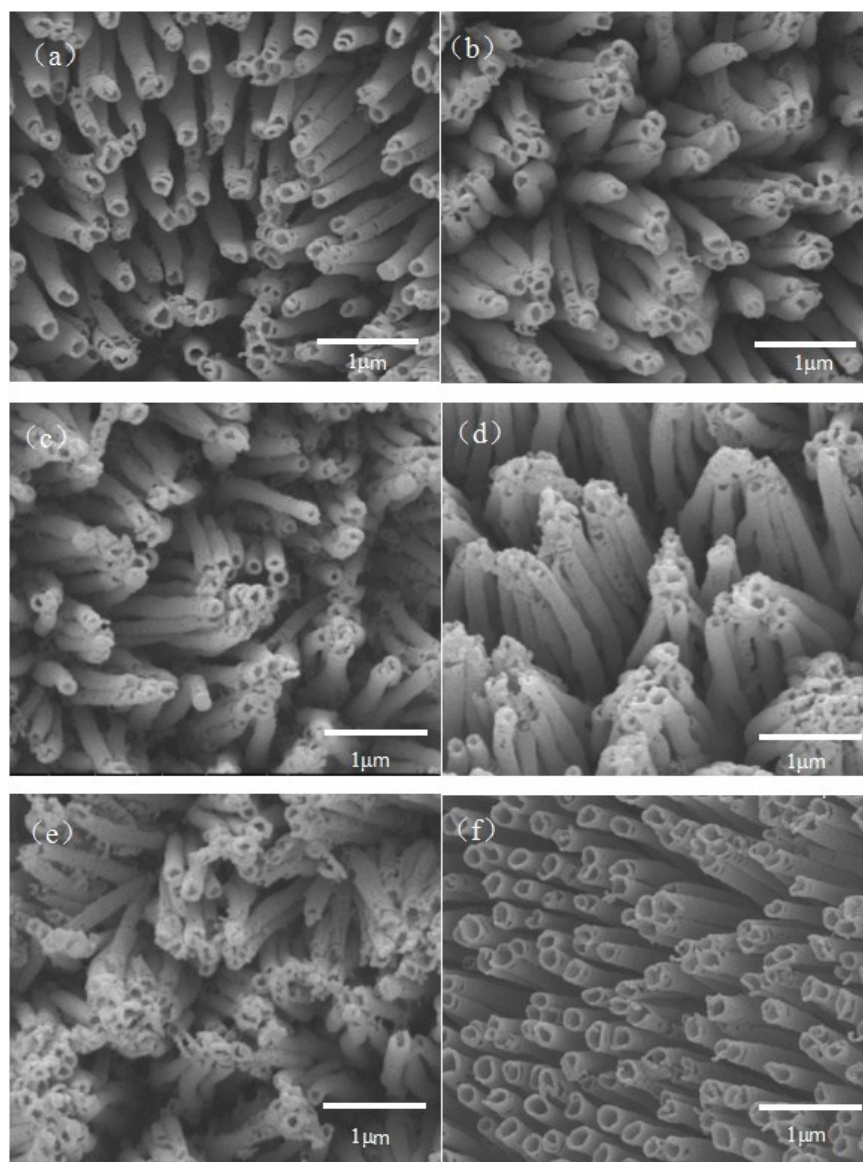

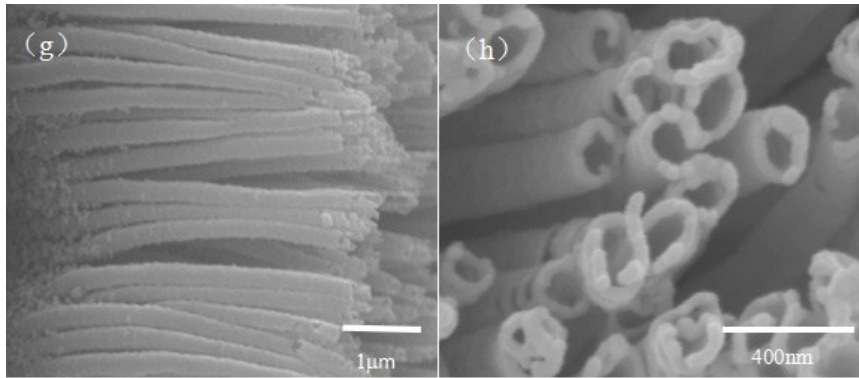

Fig.S1 SEM image of (a) 650°C (b) 700°C (c) 750°C (d) 800°C (e) 850°C (f) original TiO<sub>2</sub> (g) cross section of original TiO<sub>2</sub> (h) pipe orifice of nanotube

Fig.S1 shows the TiO<sub>2</sub> nanotube arrays anneal under a series temperature in the NH<sub>3</sub> atmosphere, after annealing, the nanotube maintain the structure basically, some nanotubes tend to gather, with the temperature higher, the tendency more obvious, Fig.S2 shows the XRD pattern of the samples which are corresponding to the Fig.S1, in the Fig.S2, the diffraction peak of anatase disappear at 750 °C, so the sample with annealing under 750 °C is best choice.

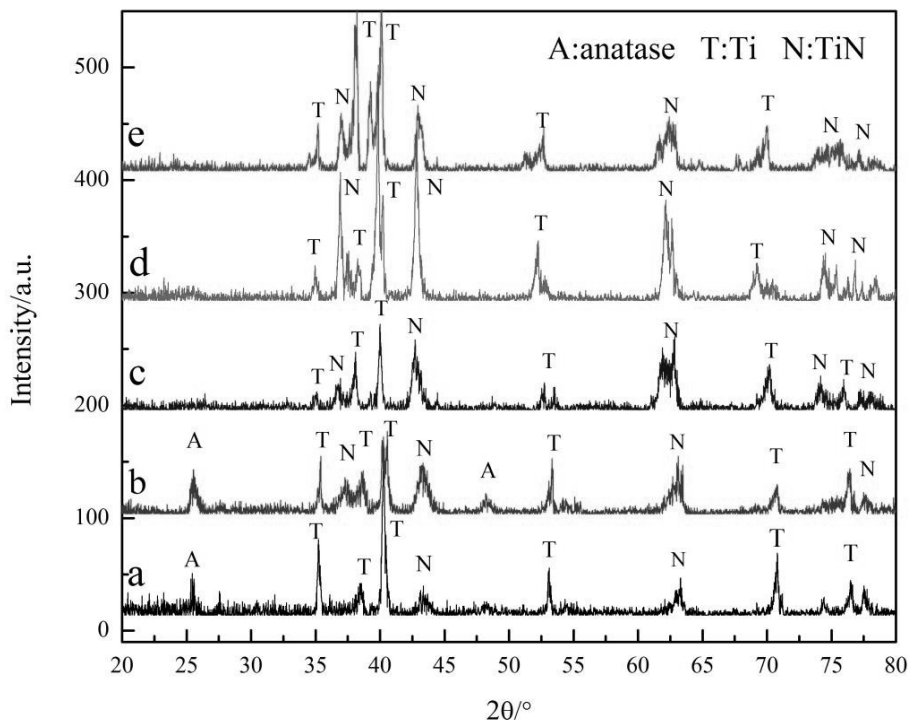

Fig.S2 XRD pattern of TiN for (a) 650°C (b) 700°C (c) 750°C (d) 800°C (e) 850°C
